# Supplementary material
Source: publisher site journal article supplement (https://www.dovepress.com/article/328180)
Supplement: Supplementary file 1 [file get_supplementary_file.php]

Supplementary file 1: This table shows optimal hyperparameters for the ML algorithms

| Algorithm | Hyperparameter | Values to select from |
| --- | --- | --- |
| ANN | Size | 5 |
|  | Decay | 0.01 |
| CART | tuneGrid | （0:10)*0.001 |
| SVM | gamma | 0.1 |
|  | cost | 1 |
